# Supplementary material for: Cellular models of Batten disease
Source: PubMed Central journal article supplement (PMC7338907; doi:10.1016/j.bbadis.2019.165559), 2020-09-01
Supplement: mmc1.pdf [file mmc1.pdf]

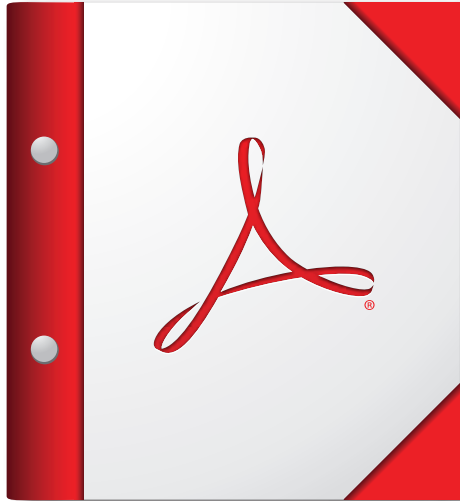

**For the best experience, open this PDF portfolio in  
Acrobat X or Adobe Reader X, or later.**

[Get Adobe Reader Now!](#)
